# Supplementary material for: CircMET promotes tumor proliferation by enhancing CDKN2A mRNA decay and upregulating SMAD3
Source: PubMed Central journal article supplement (PMC8764797; doi:10.1186/s12943-022-01497-w), 2022-01-18
Supplement: 12943_2022_1497_MOESM1_ESM.pdf [file 12943_2022_1497_MOESM1_ESM.pdf]

**CircMET promotes tumor proliferation by enhancing CDKN2A mRNA decoy and upregulating SMAD3**

Lei Yang<sup>1,2#</sup>, Yi Chen<sup>1,2#</sup>, Ning Liu<sup>1,2</sup>, Yanwen Lu<sup>1,2</sup>, Zhenhao Yang<sup>3</sup>, Weidong Gan<sup>4\*</sup>, Dongmei Li<sup>1,2\*</sup>

1. Immunology and Reproduction Biology Laboratory & State Key Laboratory of Analytical Chemistry for Life Science, Medical School, Nanjing University, Nanjing, Jiangsu 210093, China

2. Jiangsu Key Laboratory of Molecular Medicine, Nanjing University, Nanjing, Jiangsu 210093, China

3. Department of Urology, Nanjing Drum Tower Hospital Clinical College of Traditional Chinese and Western Medicine, Nanjing University of Chinese Medicine, Nanjing, Jiangsu 210008, China.

4. Department of Urology, Nanjing Drum Tower Hospital, The Affiliated Hospital of Nanjing University Medical School, Nanjing, Jiangsu 210008, China.

#These authors contributed equally to this work.

\* Corresponding Author:

Dongmei Li, Immunology and Reproduction Biology Laboratory & State Key Laboratory of Analytical Chemistry for Life Science, Medical School, Nanjing University, Nanjing, Jiangsu 210093, China.

Email: [lidm@nju.edu.cn](mailto:lidm@nju.edu.cn)

Weidong Gan, Department of Urology, Affiliated Drum Tower Hospital of Medical School of Nanjing University, Nanjing, Jiangsu 210008, China.

Email: [gwd@nju.edu.cn](mailto:gwd@nju.edu.cn)

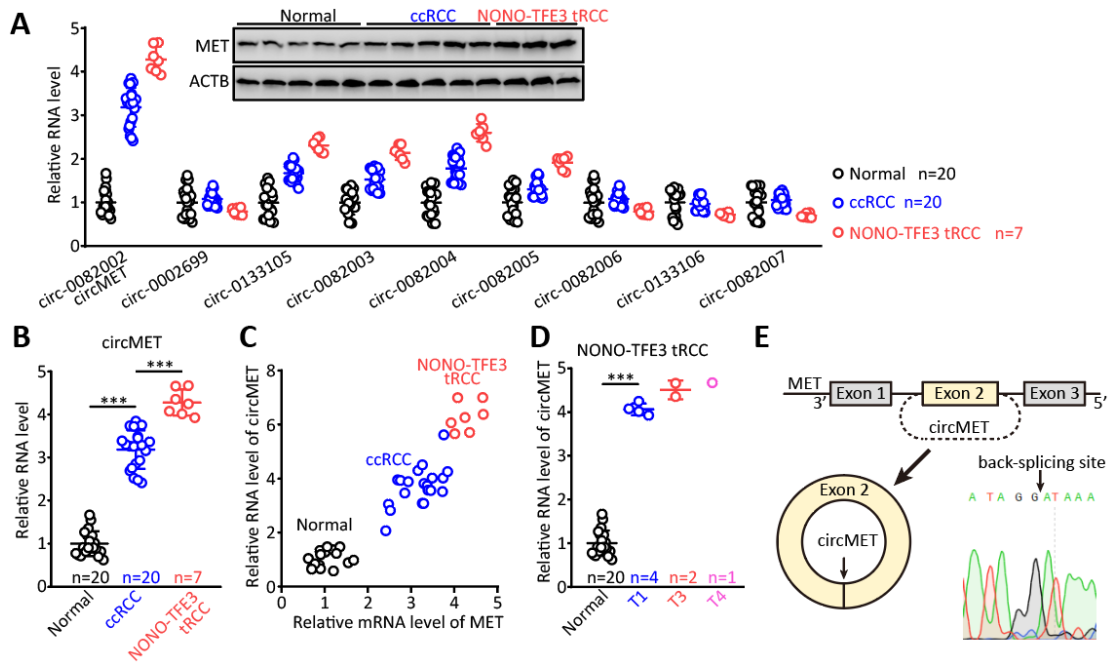

**Figure S1. The RNA level of MET mRNA and circRNAs derived from MET gene in RCC and the structural features of circMET. (A)** The RNA level of circRNAs derived from MET gene in nontumor tissues, ccRCC and NONO-TFE3 tRCC. **(B)** The RNA level of circMET in nontumor tissues, ccRCC and NONO-TFE3 tRCC. **(C)** A positive correlation between circMET and MET was observed in RCC tissues. **(D)** The correlation between circMET expression and the clinical stage were analyzed. **(E)** Scheme illustrating the production of circMET. The data are presented as the mean  $\pm$  SD, \*\*\* $P < 0.001$

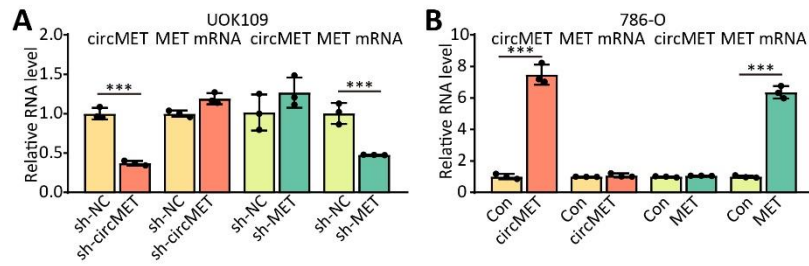

**Figure S2.** The RNA level of circMET and MET mRNA in UOK109 (**A**) and 786-O (**B**) after transfected with indicated lentivirus. The data are presented as the mean  $\pm$  SD, \*\*\* $P$  < 0.001

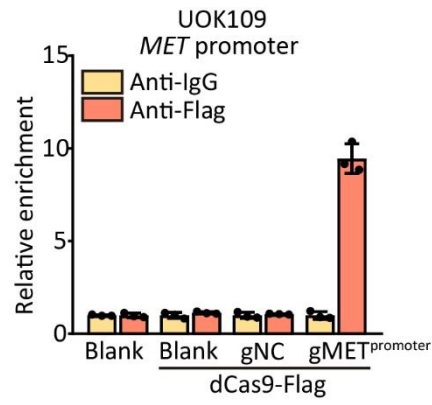

**Figure S3.** ChIP assay was performed after UOK109 cells transfected indicated lentivirus.

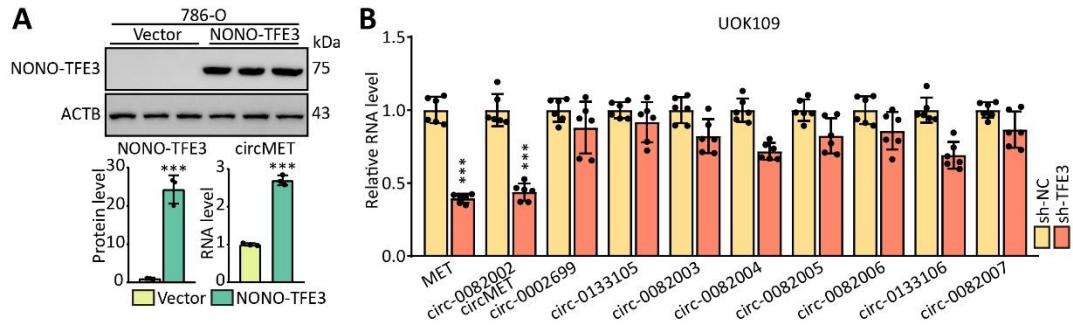

**Figure S4.** The transcription of MET gene is enhanced by NONO-TFE3. **(A)** The protein level of NONO-TFE3 and the circMET expression levels were detected after transfection with NONO-TFE3 plasmids for 48h. **(B)** The RNA level of circRNAs derived from MET gene was detected after transfected with sh-TFE3. The data are presented as the mean  $\pm$  SD, \*\*\* $P$  < 0.001

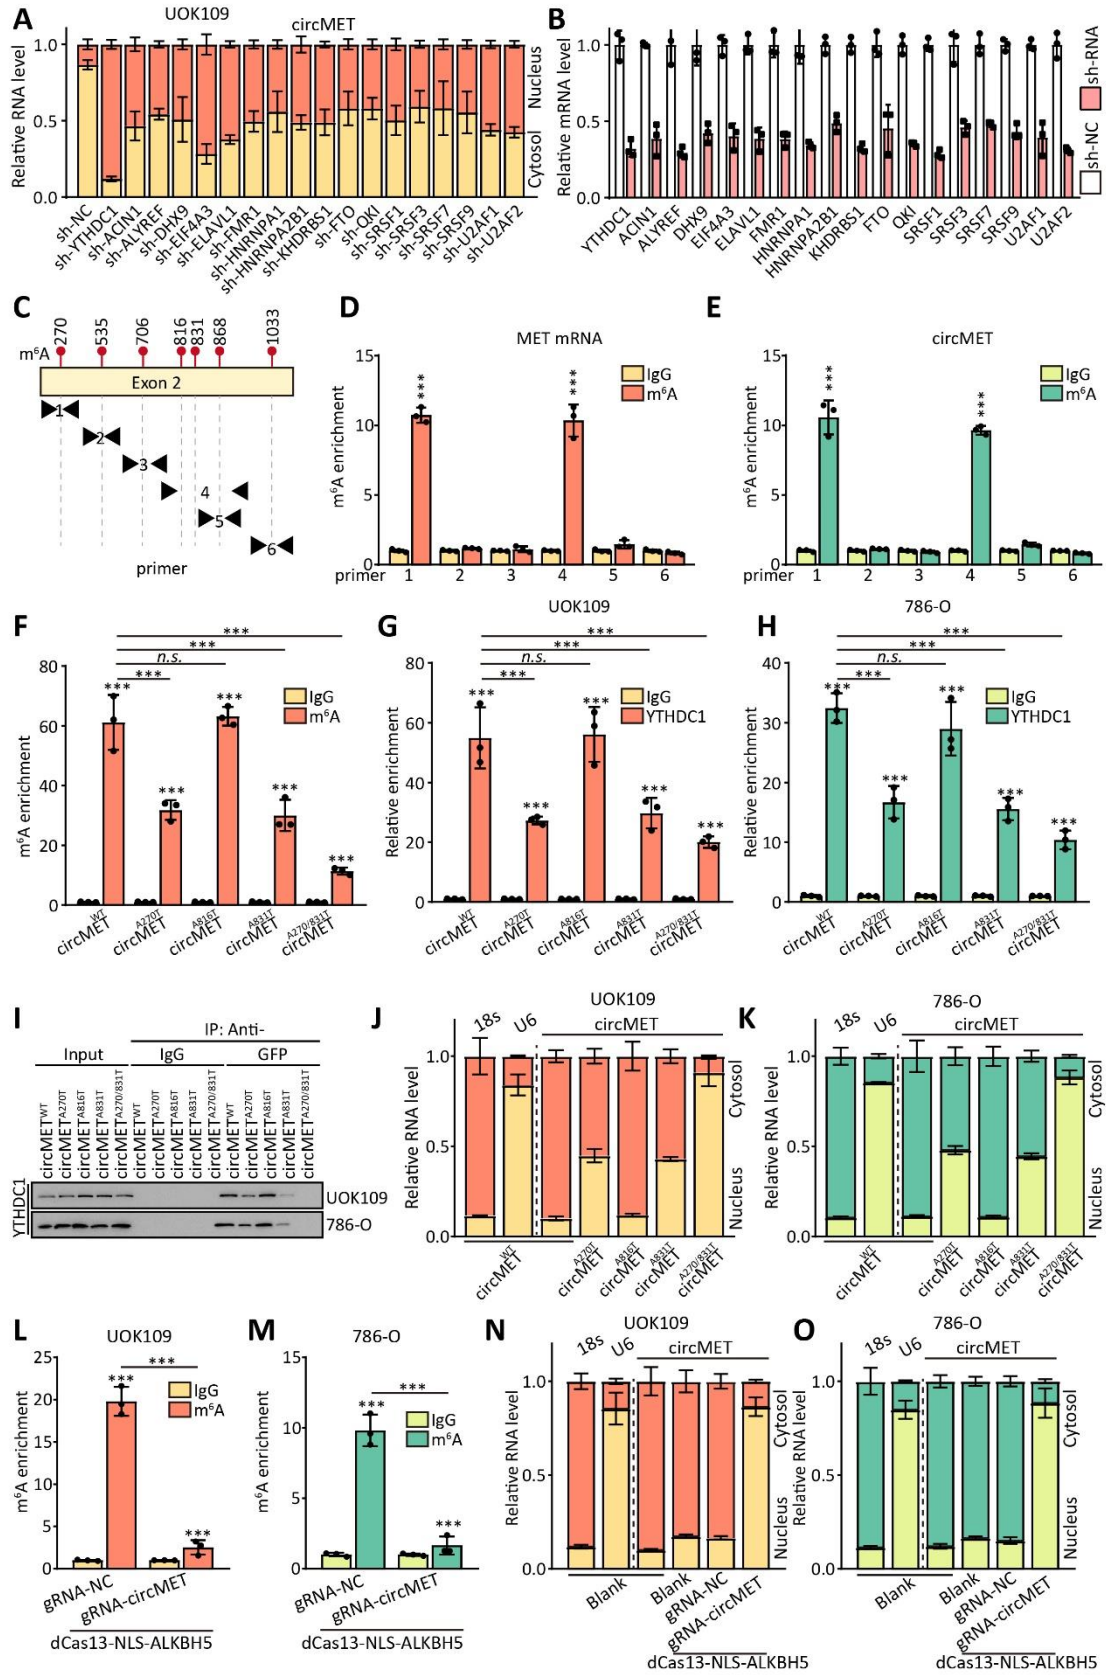

**Figure S5.** The m<sup>6</sup>A methylation is involved in the export of circMET from the nucleus. (A) The subcellular distribution of circMET was analyzed via real-time PCR

in UOK109 cells after transfected with indicated lentivirus. **(B)** The RNA level was detected via real-time PCR in UOK109 cells after transfected with indicated lentivirus. **(C)** Schematic diagram of the potential m<sup>6</sup>A methylation locus. **(D)** Abundance of MET fragment among RNA immunoprecipitated with anti-m<sup>6</sup>A antibody in UOK109 cells was measured by real-time PCR and normalized to IgG. **(E)** The total RNA isolated from UOK109 cells was treated with RNase R, and the MeRIP was performed. Abundance of circMET fragment among RNA immunoprecipitated with anti-m<sup>6</sup>A antibody was measured by real-time PCR and normalized to IgG. **(F)** The 786-O cells were transfected with circMET contained indicated mutation, and the abundance of circMET among RNA immunoprecipitated with anti-m<sup>6</sup>A antibody was measured by real-time PCR and normalized to IgG. **(G-H)** The UOK109 **(G)** and 786-O **(H)** cells were transfected with circMET contained indicated mutation, and the RIP assay was performed with YTHDC1 antibody. Abundance of circMET was measured by real-time PCR. **(I)** The UOK109 cells were transfected with MS2-GFP plasmid, circMET contained 6×MS2 stem loop and indicated mutation, and the MS2-RIP assay was performed with GFP antibody. Abundance of YTHDC1 was measured by western blot. **(J-K)** The subcellular distribution of circMET was analyzed via real-time PCR in UOK109 and 786-O cells after transfected with indicated lentivirus. U6 and 18s rRNA were used as nuclear and cytoplasmic markers, respectively. **(L-M)** The UOK109 **(L)** and 786-O **(M)** cells were transfected with indicated lentivirus, and the MeRIP assay was performed. Abundance of circMET was measured by real-time PCR. **(N-O)** The subcellular distribution of circMET was analyzed via real-time PCR in UOK109 and 786-O cells after transfected with indicated lentivirus. U6 and 18s rRNA were used as nuclear and cytoplasmic markers, respectively. The data are presented as the mean ± SD, \*\*\**P* < 0.001

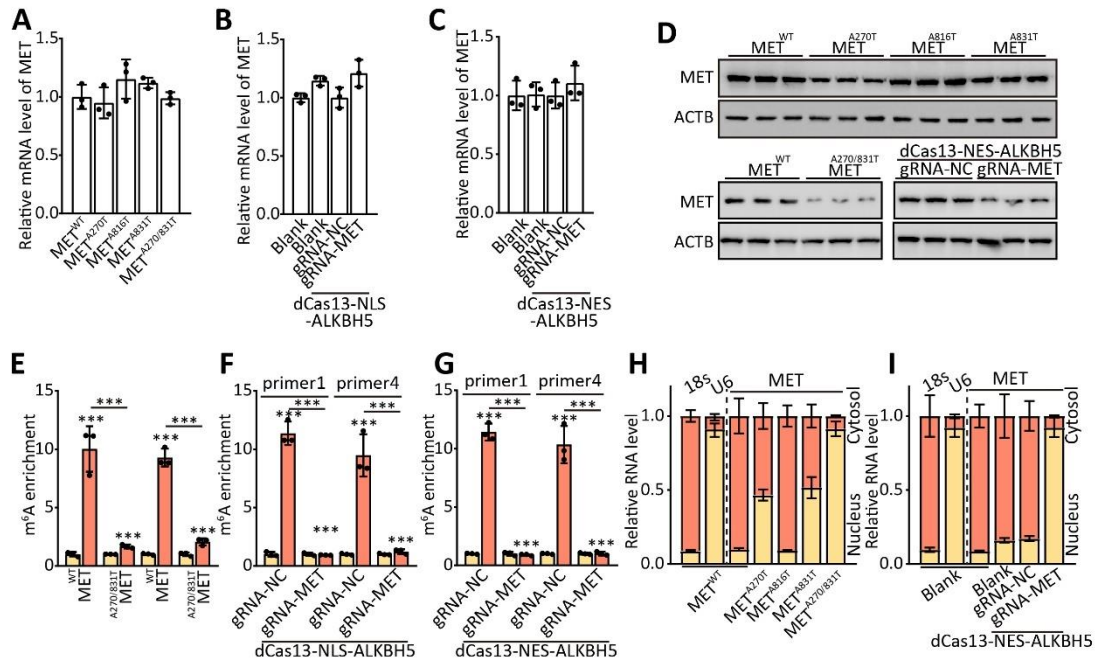

**Figure S6.** The function of m<sup>6</sup>A modification on exon 2 of MET mRNA. **(A-C)** The UOK109 cells were transfected with indicated lentivirus, and the RNA level of MET mRNA was measured by real-time PCR. **(D)** The UOK109 cells were transfected with indicated lentivirus, and the protein level of MET was measured by western blot. **(E-F)** The UOK109 cells were transfected with indicated lentivirus, and the abundance of circMET among RNA immunoprecipitated with anti-m<sup>6</sup>A antibody was measured by real-time PCR and normalized to IgG. **(H-I)** The subcellular distribution of circMET was analyzed via real-time PCR in UOK109 cells after transfected with indicated lentivirus. U6 and 18s rRNA were used as nuclear and cytoplasmic markers, respectively. The data are presented as the mean  $\pm$  SD, \*\*\* $P$  < 0.001



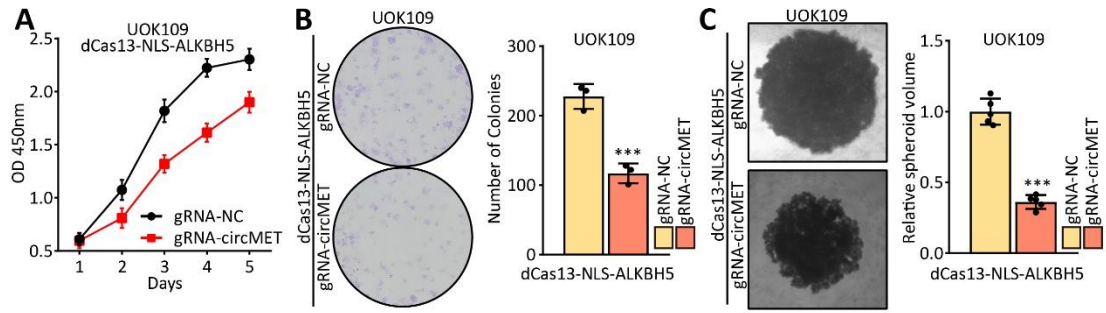

**Figure S7.** The  $m^6A$  modification on circMET promotes tumor proliferation. **(A)** Cell viability of UOK109 and 786-O cells was determined using CCK-8 assays after transfection for 48h. **(B-D)** A colony formation and tumor sphere formation assay were used to determine the colony and tumor sphere formation ability of UOK109 and 786-O cells co-transfected with indicated lentivirus. The data are presented as the mean  $\pm$  SD, \*\*\* $P < 0.001$

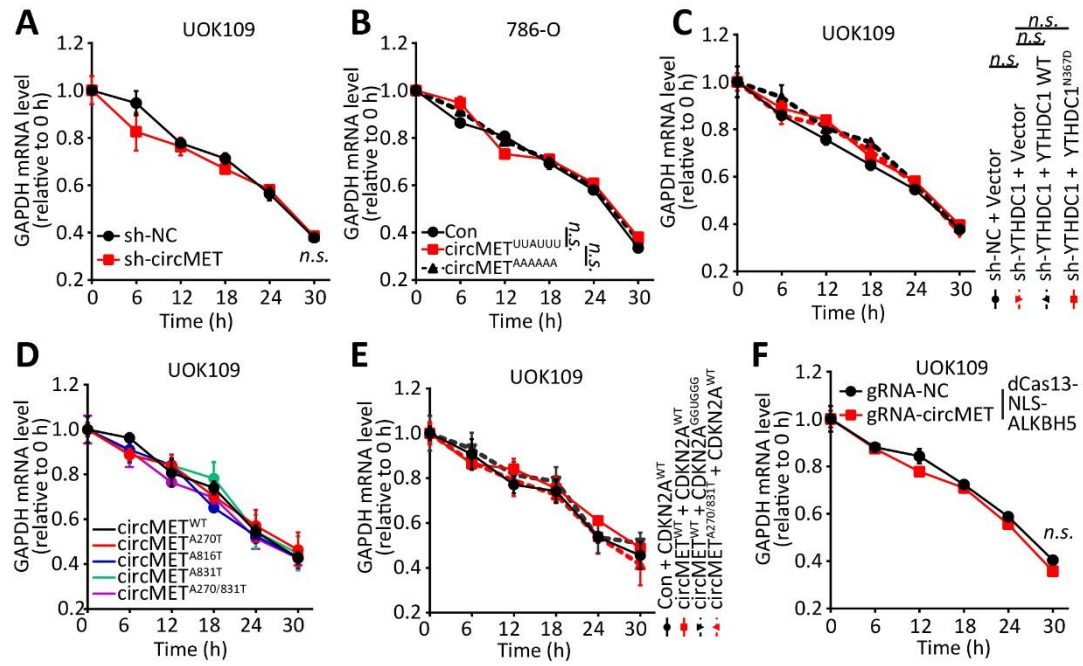

**Figure S8.** The stability of GAPDH mRNA in cells transfected with indicated lentivirus after treatment with  $\alpha$ -amanitin. The data are presented as the mean  $\pm$  SD

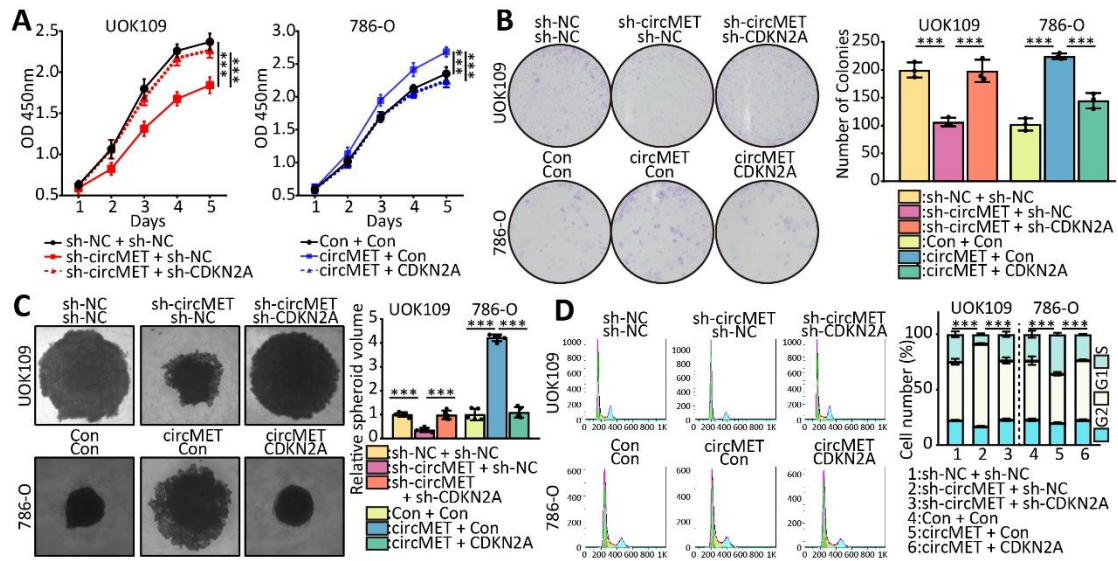

**Figure S9.** CircMET mediates *NONO-TFE3* tRCC proliferation through CDKN2A.

(A) Cell viability of UOK109 and 786-O cells was determined using CCK-8 assays after transfection for 48h. (B-C) A colony formation and tumor sphere formation assay were used to determine the colony and tumor sphere formation ability of UOK109 and 786-O cells co-transfected with indicated lentivirus. (D) Cell cycle analysis was performed using flow cytometry in cells transfected with indicated lentivirus. The data are presented as the mean  $\pm$  SD, \*\* $P$  < 0.01, \*\*\* $P$  < 0.001

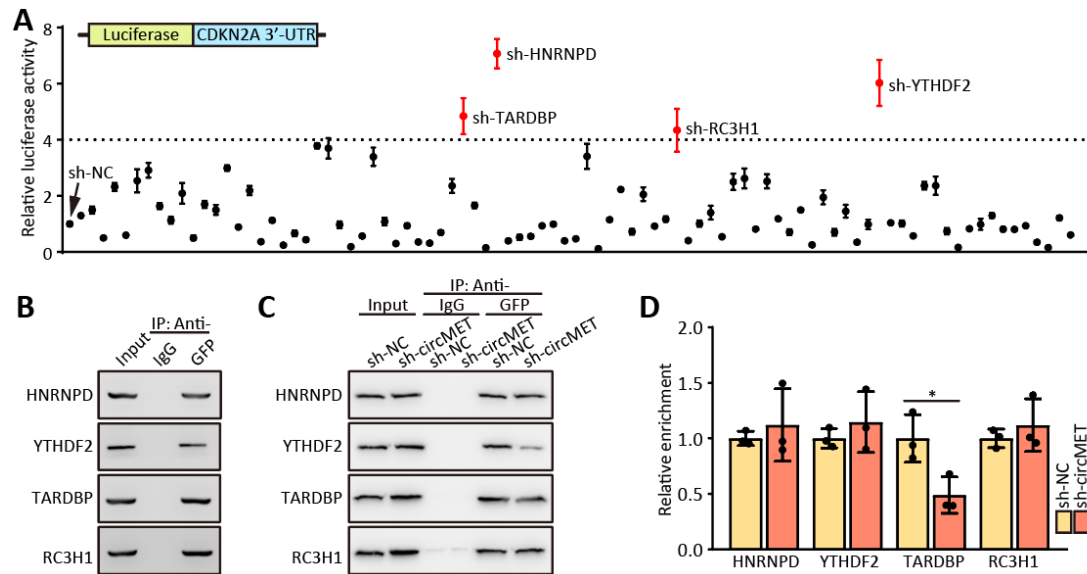

**Figure S10.** CircMET mediates the RNA level of CDKN2A through YTHDF2. **(A)** HEK293T cells were co-transfected with indicated mRNA 3'-UTR luciferase truncations and shRNAs, and the luciferase activity was determined using a dual luciferase reporter assay after 48h. **(B)** MS2-RIP assays were performed to confirm the association of indicated protein with circMET. **(C-D)** The UOK109 cells were transfected with MS2-GFP plasmid, CDKN2A contained 6×MS2 stem loop and indicated shRNAs, and the MS2-RIP assay was performed with GFP antibody. Abundance of YTHDF2 was measured by western blot. The data are presented as the mean ± SD, \* $P < 0.05$

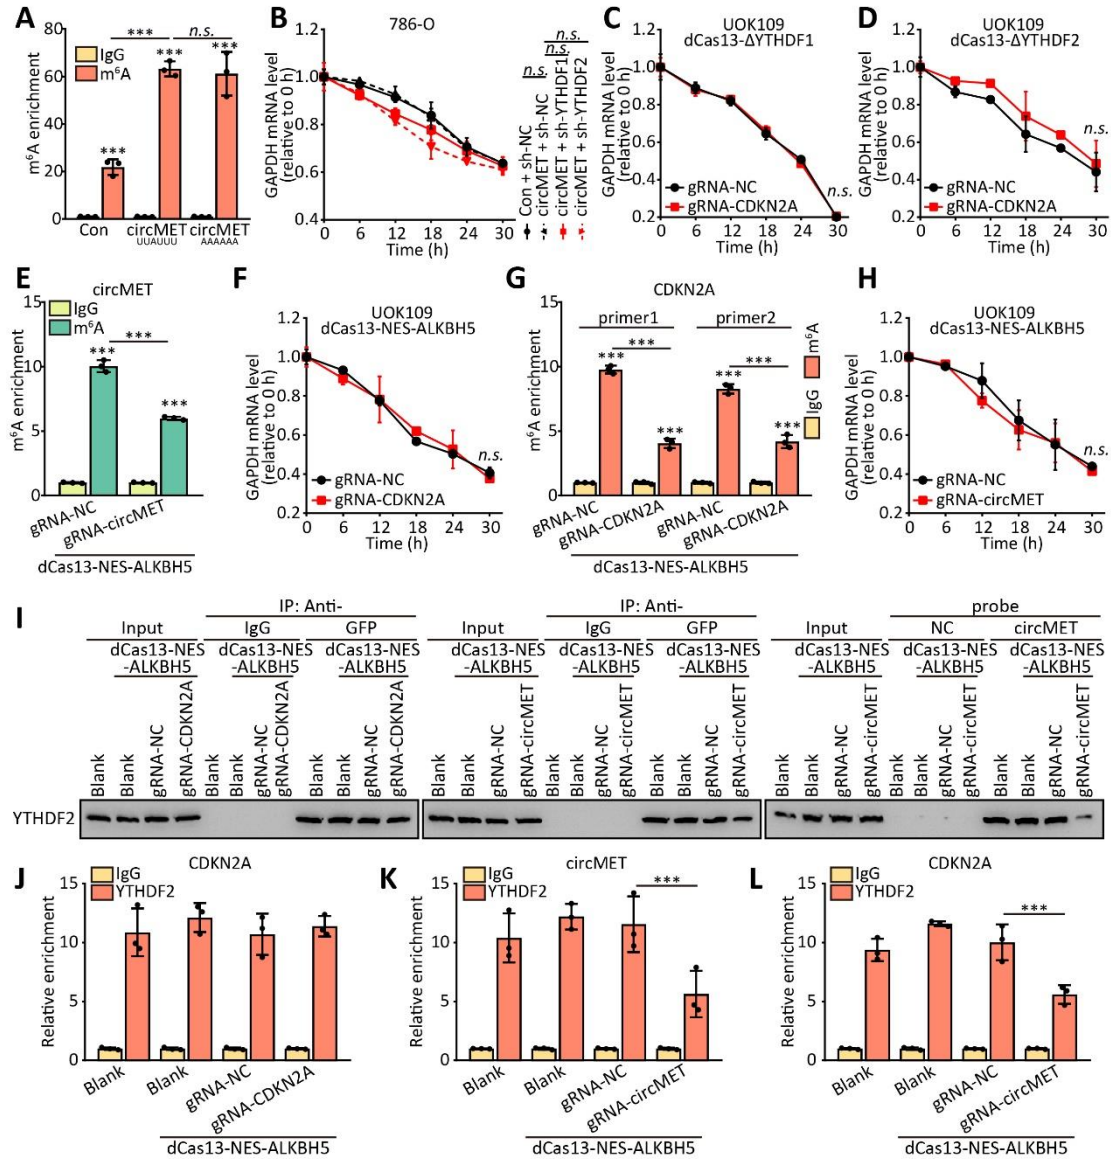

**Figure S11.** CircMET recruits YTHDF2 to CDKN2A mRNA via m<sup>6</sup>A methylation.

(A) The UOK109 cells were transfected with indicated lentivirus, and the abundance of circMET among RNA immunoprecipitated with anti-m<sup>6</sup>A antibody was measured by real-time PCR and normalized to IgG. (B-D) The stability of GAPDH mRNA in cells transfected with indicated lentivirus after treatment with α-amanitin. (E) The UOK109 cells were transfected with indicated lentivirus, and the abundance of circMET among RNA immunoprecipitated with anti-m<sup>6</sup>A antibody was measured by real-time PCR and normalized to IgG. (G) The stability of GAPDH mRNA in cells transfected with indicated lentivirus after treatment with α-amanitin. (F) The UOK109 cells were transfected with indicated lentivirus, and the abundance of CDKN2A

among RNA immunoprecipitated with anti-m<sup>6</sup>A antibody was measured by real-time PCR and normalized to IgG. **(H)** The stability of GAPDH mRNA in cells transfected with indicated lentivirus after treatment with  $\alpha$ -amanitin. **(I)** The UOK109 cells were transfected with indicated lentivirus, and the MS2-RIP assay and RNA pulldown were performed with GFP antibody or circMET probe. Abundance of YTHDF2 was measured by western blot. **(J-K)** The UOK109 cells were transfected with indicated lentivirus, and the RIP assay was performed with YTHDF2 antibody. Abundance of circMET or CDKN2A was measured by real-time PCR. The data are presented as the mean  $\pm$  SD, \*\*\* $P < 0.001$

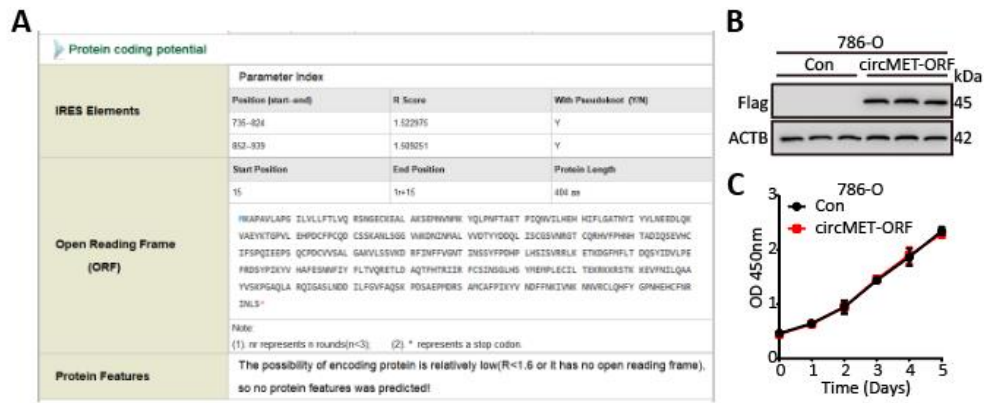

**Figure S12.** The function of potential peptide encoded by circMET. **(A)** The possibility of encoding protein of circMET was predicted. **(B)** The potential peptide encoded by circMET was overexpressed in 786-O cells. **(C)** Cell viability of UOK109 cells was determined using CCK-8 assay after transfection for 48h. The data are presented as the mean  $\pm$  SD

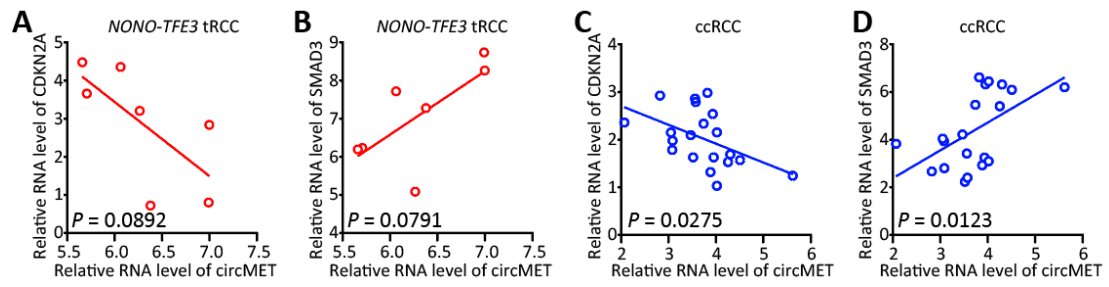

**Figure S13.** Relationship between circMET and CDKN2A and SMAD3 mRNA in *NONO-TFE3* tRCC (A) and ccRCC (B).



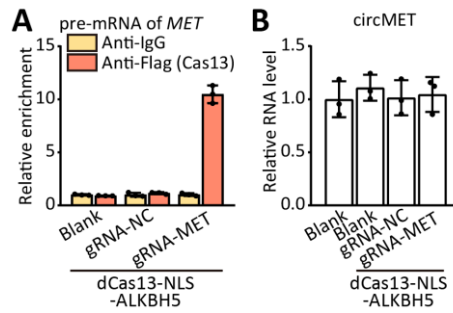

**Figure S14.** The function of m<sup>6</sup>A modification on exon 2 of MET mRNA. **(A)** The UOK109 cells were transfected with indicated lentivirus, and the abundance of pre-mRNA of *MET* among RNA immunoprecipitated with anti-Flag antibody was measured by real-time PCR and normalized to IgG. **(B)** The UOK109 cells were transfected with indicated lentivirus, and the RNA level of circMET was measured by real-time PCR.

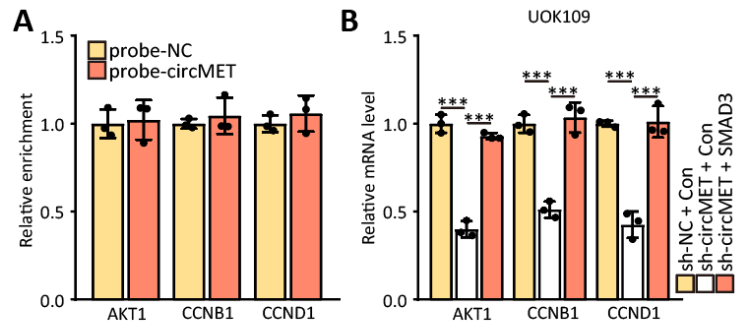

**Figure S15.** Relationship between circMET and AKT1, CCNB1 and CCND1 mRNA. **(A)** RNA pulldown assay was performed to confirm the association of AKT1, CCNB1 and CCND1 mRNA with circMET. **(B)** The RNA level of AKT1, CCNB1 and CCND1 mRNA in UOK109 cells after transfected with indicated lentivirus. The data are presented as the mean  $\pm$  SD, \*\*\* $P$  < 0.001

**Table S1.** Primers used for real-time PCR.

| Target<br>gene | Primer sequence (5'-3')  |                         | Size<br>(bp) |
|----------------|--------------------------|-------------------------|--------------|
|                | Forward                  | Reverse                 |              |
| circMET        | AGCACTGCTTTAATAGGATAAACC | TCGGACTTTGCTAGTGCCTC    | 123          |
| CDKN2A         | CTTCCTCGGGTGCCGATAC      | ACCCCTTCATTGCTACTCGAT   | 153          |
| SMAD3          | GCGTGCGGCTCTACTACATC     | GCACATTCGGGTCAACTGGTA   | 233          |
| 18s rRNA       | CAGCCACCCGAGATTGAGCA     | TAGTAGCGACGGGCGGTGTG    | 252          |
| GAPDH          | AACGGATTGGTCGTATTGGG     | CCTGGAAGATGGTGATGGGAT   | 211          |
| AKT1           | TCCTCCTCAAGAATGATGGCA    | GTGCGTTCGATGACAGTGGT    | 181          |
| CCNB1          | AATAAGGCGAAGATCAACATGGC  | TTTGTACCAATGTCCCAAGAG   | 111          |
| CCND1          | CAATGACCCCGCACGATTC      | CATGGAGGGCGGATTGGAA     | 146          |
| circMET ▷◁     | GGTTCACTGCATATTCTCCCC    | ACCATCTTTCGTTTCCTTTAGCC | 205          |
| circMET ◁▷     | AGCACTGCTTTAATAGGATAAACC | TCGGACTTTGCTAGTGCCTC    | 123          |
| GAPDH ▷◁       | AACGGATTGGTCGTATTGGG     | CCTGGAAGATGGTGATGGGAT   | 211          |
| GAPDH ◁▷       | CCCAATACGACCAAATCCGTT    | ATCCCATCACCATCTTCCAGG   | NA           |
| TFE3           | TGCCTGTGTCAGGGAATCTG     | CGACGCTCAATTAGGTTGTGAT  | 184          |

**Table S2.** Primers used for ChIP assay and MeRIP.

| Target          | Primer sequence (5'-3')   |                           | Size |
|-----------------|---------------------------|---------------------------|------|
| promoter        | Forward                   | Reverse                   | (bp) |
| MET site1       | GCTGAGGCCTCTGGTATGG       | AGTGATTTCAAGTCCTCAAAGAGA  | 229  |
| MET site2       | AGAGGTAATCTCTTTGAGGACTGA  | CGTTCCGGCTCTCATACCAA      | 248  |
| MET site3       | AGTTTCACCTTGTCGTGGGC      | CCAGGCGACCAGACTGAG        | 224  |
| Target          | Primer sequence (5'-3')   |                           | Size |
| RNA             | Forward                   | Reverse                   | (bp) |
| MET primer 1    | CAGAGGAGCAATGGGGAGTG      | ATCTGGGTGTCCAGCACAG       | 225  |
| MET primer 2    | CAGTCGGAGGTTCACTGCAT      | AAAGGACTTTGGCTCCCAGG      | 94   |
| MET primer 3    | TGGGAGCCAAAGTCCTTTCA      | TGCTTTCAAAGGCATGGACA      | 228  |
| MET primer 4    | TCCATGCCTTTGAAAGCAACA     | ACAGAACCTGATTATTCTTGTGTGA | 98   |
| MET primer 5    | TCACACAAGAATAATCAGGTTCTGT | CATCATTCAAGGCTGGCTCCT     | 197  |
| MET primer 6    | AGGAGCCAGCCTGAATGATG      | AGCAGTGCTCATGATTGGGT      | 194  |
| CDKN2A Primer 1 | CCAGGTCATGATGATGGGCA      | TGCAGCACCACCAGCG          | 147  |
| CDKN2A Primer 2 | ACACGCTGGTGGTGCTG         | AATCGGGGATGTCTGAGGGA      | 195  |

**Table S3.** Probes used for RNA FISH.

| Target transcript | Probe sequence (5'-3')       |
|-------------------|------------------------------|
| circMET probe1    | TGAGAGGTTTATCCTATTAAGCAG     |
| circMET probe2    | GAGAGGTTTATCCTATTAAGCAGTGCT  |
| U6 probe          | TTGCGTGTCATCTTCG             |
| 18s rRNA probe    | CTGCCTCCTGGATGTGGGTAGCCGTTTC |

**Table S4.** ShRNA used for silencing target genes.

| Target transcript | Sequence (5'-3')       |
|-------------------|------------------------|
| circMET           | GCTTTAATAGGATAAACCTCT  |
| YTHDF1            | CCCTACCTGTCCAGCTATTAC  |
| YTHDF2            | GATGGATTAACGATGATGAT   |
| YTHDC1            | TGCCTCCAGAGAACCTTATAA  |
| SMAD3             | GAGCCTGGTCAAGAACTCAA   |
| CDKN2A            | AGTAACCATGCCGCATAGAT   |
| TFE3              | CAGCTCCGAATTCAGGAACTA  |
| ACIN1             | AGCAAGATGAGCTGGATTATC  |
| ADAR              | GCCCACTGTTATCTTCACTTT  |
| ALYREF            | CGTGGAGACAGGTGGGAACT   |
| AUH               | GCCCACTGTTATCTTCACTTT  |
| BCCIP             | GCCTTCTCCTAAGTGAAAGAT  |
| BUD13             | CGAGTATCTGAAGCGTTACTT  |
| CELF2             | CGCAGAGTAAAGGTTGTTGTT  |
| CNBP              | ATTGAGGCTACAGCCTAATTA  |
| CSTF2T            | CAAAGGCAGAGTATCCTGATT  |
| DDX54             | CCCGGTGTTCAAAGGCATCAT  |
| DGCR8             | CCAATCAGAAGCTCATTACTT  |
| DHX9              | GAAGGATTACTACTCAAGAAA  |
| DICER1            | GCCCACTGTTATCTTCACTTT  |
| DKC1              | CACTATACACCTCTTGCATGT  |
| EIF4A3            | GCCCACTGTTATCTTCACTTT  |
| ELAVL1            | GCAGCATTGGTGAAGTTGAAT  |
| ELAVL3            | CCGTGATTTACCACCAACAA   |
| EWSR1             | TGCATTGACTACCAGATTAT   |
| FAM120A           | GCCTTGAATAATGACTCTAAA  |
| FBL               | CCTTGAGCCATATGAAAGAGA  |
| FKBP4             | GCATGGAGAAAGGAGAACATT  |
| FMR1              | GCCCACTGTTATCTTCACTTT  |
| FTO               | TCACCAAGGAGACTGCTATTT  |
| FUS               | ATGAATGCAACCAAGTGAAGG  |
| FXR1              | CGCCAGGTCCATTTAATGAA   |
| FXR2              | GCGGATGATGAAGGGAGATTT  |
| GTF2F1            | GCGCAAGATGATCAACGACAA  |
| HNRNPA1           | AGATATTTGTTGGTGGCATT   |
| HNRNPA2B1         | CAGAAATACCATACCATCAAT  |
| HNRNPC            | GCGCTTGTCTAAGATCAAATT  |
| HNRNPD            | AGAGTGGTTATGGGAAGGTAT  |
| HNRNPK            | TGATGTTTGATGACCGTCGCG  |
| HNRNPL            | GCCGACAACCAATATACATT   |
| HNRNPM            | CTGTGCAAGCTATATCTATGT  |
| HNRNPU            | CAGTGCTTCTCCCTTACAAT   |
| HNRNPUL1          | GCCCGCAAGAAACGCAACTAT  |
| IGF2BP1           | GCAGTGGTGAATGTCACCTAT  |
| IGF2BP2           | AGTGAAGCTGGAAGCGCATAT  |
| IGF2BP3           | CGGTGAATGAACTTCAGAATT  |
| KHDRBS1           | GTACCGGATATGATGGATGAT  |
| KHDRBS2           | GCTCTCAGAAAGAGTACTGAT  |
| KHDRBS3           | GCTGGGACAGAAAGTGTTAAT  |
| LARP4B            | CAGGCTATCTAGCTTGATAAT  |
| LARP7             | CTTGAGCTGTTCTTGGGAGAT  |
| LIN28             | TGCTACAACCTGGGAGGTCTA  |
| LIN28A            | GCACCAGAGTAAGCTGCACAT  |
| LIN28B            | AGAGCATGCAGAAGCGCAGAT  |
| MBNL2             | CGGTATTAGCTTTGCTCCTT   |
| MOV10             | CGTTACTGCATCACCAAACCT  |
| MSI1              | CACGTTTGAGAGTGAGGACAT  |
| NOP56             | CCTGGCAAACAATGCAAGTAT  |
| NOP58             | TTAGTTGGAGCACGGCTTATT  |
| NUMA1             | CCTTGAAGAGAAGAACGAAAT  |
| PCBP2             | CCTGGCTCAATATCTAATCAA  |
| PRPF8             | CGCCTCATGAAACATGATGTT  |
| PTBP1             | CTCAACGTCGAAGTACAACAAT |
| PUM2              | CCTAATCCTACAGCTAATAAA  |

|         |                        |
|---------|------------------------|
| QKI     | CTGATGCTGTGGGACCTATTG  |
| RANGAP1 | CTGCCTTCCTAAAGGTGTCAT  |
| RBF0X2  | CGGGTTCGTAACCTTCGAGAA  |
| RBM10   | CTTCGCCTTCGTCGAGTTTAG  |
| RBM47   | GATGAAGAAGCGCGAGGAAAT  |
| RBM5    | CCCAGACCTAAGTTTGAAGAT  |
| RBM6    | CAAATGTAGAGGAGCATTCTT  |
| RC3H1   | CGTGTTGTAAACTCTCAGTAT  |
| RNF219  | CCAGTTCTTGCCAGTAACTA   |
| RTCB    | AGAGGCTCCTGAGTCCTATAA  |
| SF3A3   | CGAGACACTGAAAGGAACAAA  |
| SF3B4   | CCCTGAGATTGATGAGAAGTT  |
| SLTM    | CTAGATACAGATGCACGATTT  |
| SMNDC1  | CTGGTAAAGTTGGAGTAGGAA  |
| SND1    | GCCAAAGGAAACTTGCCTTAT  |
| SRSF1   | GAAGCAGGTGATGTATGTTAT  |
| SRSF10  | CGTGATGCTGAAGACGCTTTA  |
| SRSF3   | TGGAACTGTGAATGGTGAAA   |
| SRSF7   | GAAGTGTATGGATTGCGAGAA  |
| SRSF9   | TGGAAGAAATGGTTATGATTA  |
| TAF15   | GCTCGAAGGAATTCCTGCAAT  |
| TARDBP  | GCTCTAATTCTGGTGCAGCAA  |
| TIA1    | GCTCTAATTCTGCAACTCTTT  |
| TIAL1   | CTTCAGTTGTTTCAGTCAGATT |
| TRA2A   | CGTCGAGATTCTTACTATGAT  |
| U2AF1   | GAAAGTGGTTGATGTTGATTGA |
| U2AF2   | CGACGAGGAGTATGAGGAGAT  |
| UPF1    | GCCTACCAGTACCAGAACATA  |
| ZC3H7B  | CGAGATCTGCTTTGACAGTAA  |

---

**Table S5.** Guide RNA used for dCas9-ChIP system and targeted RNA methylation system.

| Target promoter               | gRNA sequence (5'-3') |
|-------------------------------|-----------------------|
| MET <sup>promoter</sup> gRNA1 | TGGCAGGGCAGCGCGTGT    |
| MET <sup>promoter</sup> gRNA2 | CCAGTGACTCAGCCGGGCAT  |
| MET <sup>promoter</sup> gRNA3 | GCCCGGCTGAGTCACTGGCA  |

  

| Target transcript | gRNA sequence (5'-3')   |
|-------------------|-------------------------|
| circMET gRNA1     | GCTTTAATAGGATAAACCTCTCA |
| circMET gRNA2     | GCACTGCTTTAATAGGATAAACC |
| circMET gRNA3     | CTGCTTTAATAGGATAAACCTCT |
| CDKN2A gRNA1      | ATCTACGTAAAAGGCAGGACAT  |
| CDKN2A gRNA2      | GACATCGCGATGGCCCAGCTCCT |
| CDKN2A gRNA3      | ACATCGCGATGGCCCAGCTCCTC |



**Table S6.** Primary antibodies used in this study.

| Source                    | Primary antibodies                               | Catalog no. | Working dilution           |
|---------------------------|--------------------------------------------------|-------------|----------------------------|
| Sigma-Aldrich             | Anti-TFE3 antibody produced in rabbit            | HPA023881   | ChIP: 5 $\mu$ g            |
| ProteinTech               | Anti-TFE3 antibody produced in rabbit            | 14480-1-AP  | WB: 1:2000                 |
| ProteinTech               | Anti-SMAD3 antibody produced in rabbit           | 25494-1-AP  | WB: 1:1000                 |
| Abcam                     | Anti-CDKN2A antibody produced in mouse           | ab109520    | WB: 1:1000                 |
| ProteinTech               | Anti-YTHDC1 antibody produced in rabbit          | 14392-1-AP  | WB: 1:1000 RIP: 5 $\mu$ g  |
| ProteinTech               | Anti-YTHDF1 antibody produced in rabbit          | 17479-1-AP  | WB: 1:1000                 |
| ProteinTech               | Anti-YTHDF2 antibody produced in rabbit          | 24744-1-AP  | WB: 1:2500 RIP: 5 $\mu$ g  |
| ProteinTech               | Anti-Flag antibody produced in rabbit            | 80010-1-RR  | WB: 1:2500 ChIP: 5 $\mu$ g |
| ProteinTech               | Anti-GFP antibody produced in rabbit             | 50430-2-AP  | WB: 1:2500 RIP: 5 $\mu$ g  |
| ABclonal                  | Anti-ACTB antibody produced in rabbit            | AC026       | WB: 1:15000                |
| Abcam                     | Anti-m <sup>6</sup> A antibody produced in mouse | ab151230    | RIP: 5 $\mu$ g             |
| Cell Signaling Technology | Anti-AGO2 antibody produced in rabbit            | 2897        | RIP: 5 $\mu$ g             |
